# Supplementary material for: Novel graph attention autoencoder framework with multilayered validation identifies drug repurposing candidates for COVID-19 treatment
Source: Research Square preprint supplement (doi:10.21203/rs.3.rs-8274293/v1), 2026-01-08
Supplement: Supplementary file 1 [file c17978638a1b335656372ed8.xlsx]

## Sheet: artesunate
NCT Number	Study Title	Study URL	Study Status	Conditions	Interventions	Sponsor	Collaborators	Study Type
NCT04387240	Evaluating the Efficacy of Artesunate in Adults With Mild Symptoms of COVID-19	https://clinicaltrials.gov/study/NCT04387240	WITHDRAWN	Covid 19 Positive|Corona Virus Infection	DRUG: Artemisinin / Artesunate|OTHER: placebo	Princess Nourah Bint Abdulrahman University		INTERVENTIONAL
NCT05273242	Add-on Study on WHO Solidarity Trial Plus for COVID-19 in Nepal	https://clinicaltrials.gov/study/NCT05273242	UNKNOWN	COVID-19	DRUG: Artesunate Injection	Nepal Health Research Council	World Health Organization	INTERVENTIONAL
NCT05633420	Pilot Clinical Trial to Explore Efficacy and Safety of Pyramax in Mild to Moderate COVID-19 Patients	https://clinicaltrials.gov/study/NCT05633420	COMPLETED	COVID-19	DRUG: Pyramax	Shin Poong Pharmaceutical Co. Ltd.		INTERVENTIONAL
NCT04701606	The Safety and Efficacy of Pyronaridine-artesunate (Pyramaxﾂｮ or Artecomﾂｮ)in COVID-19 Patients	https://clinicaltrials.gov/study/NCT04701606	UNKNOWN	Covid19	DRUG: Artecomﾂｮ (pyronaridine-artesunate)|DRUG: Placebo	Shin Poong Pharmaceutical Co. Ltd.		INTERVENTIONAL
NCT04475107	The Efficacy and Safety of Pyramax in Mild to Moderate COVID-19 Patients	https://clinicaltrials.gov/study/NCT04475107	COMPLETED	COVID-19	DRUG: Pyronaridine-Artesunate|DRUG: Placebo	Shin Poong Pharmaceutical Co. Ltd.		INTERVENTIONAL
NCT04532931	COVID-19 Treatment in South Africa	https://clinicaltrials.gov/study/NCT04532931	COMPLETED	COVID-19	OTHER: Standard of care (Paracetamol)|DRUG: Artesunate-amodiaquine|DRUG: Pyronaridine-artesunate|DRUG: Favipiravir plus Nitazoxanide|DRUG: Sofosbuvir/daclatasvir	Shin Poong Pharmaceutical Co. Ltd.	Medicines for Malaria Venture	INTERVENTIONAL
NCT04330690	Treatments for COVID-19: Canadian Arm of the SOLIDARITY Trial	https://clinicaltrials.gov/study/NCT04330690	UNKNOWN	COVID-19	DRUG: Artesunate|DRUG: Imatinib|DRUG: Infliximab|DRUG: Dexamethasone|DRUG: LSALT Peptide	Sunnybrook Health Sciences Centre	AbbVie|Apotex Inc.|World Health Organization|University of British Columbia|Arch Biopartners Inc.	INTERVENTIONAL
NCT04695197	Malaria as a Risk Factor for COVID-19 in Western Kenya and Burkina Faso	https://clinicaltrials.gov/study/NCT04695197	COMPLETED	Covid-19|Malaria	DRUG: Artemether-lumefantrine (AL)|DRUG: Pyronaridine-artesunate (PA)	Liverpool School of Tropical Medicine	London School of Hygiene and Tropical Medicine|Kenya Medical Research Institute|Groupe de Recherche Action en Sante|Centres for Disease Control and Prevention, Kenya.|Bill and Melinda Gates Foundation|Centers for Disease Control and Prevention	INTERVENTIONAL
NCT05084911	The Efficacy and Safety of Pyramax in Mild to Moderate COVID-19 Patients (Phase3)	https://clinicaltrials.gov/study/NCT05084911	COMPLETED	COVID-19	DRUG: Pyramax|DRUG: Placebo	Shin Poong Pharmaceutical Co. Ltd.		INTERVENTIONAL
NCT04374019	Novel Agents for Treatment of High-risk COVID-19 Positive Patients	https://clinicaltrials.gov/study/NCT04374019	TERMINATED	COVID|Sars-CoV2	DRUG: Ivermectin|DRUG: Camostat Mesilate|DIETARY_SUPPLEMENT: Artemesia annua|DRUG: Artesunate	Susanne Arnold		INTERVENTIONAL

## Sheet: sirolimus
NCT Number	Study Title	Study URL	Study Status	Conditions	Interventions	Sponsor	Collaborators	Study Type
NCT04461340	Efficacy and Safety of Sirolimus in COVID-19 Infection	https://clinicaltrials.gov/study/NCT04461340	UNKNOWN	COVID 19	DRUG: Sirolimus	Alexandria University		INTERVENTIONAL
NCT04371640	Sirolimus in COVID-19 Phase 1	https://clinicaltrials.gov/study/NCT04371640	WITHDRAWN	SARS-CoV-2|Covid-19	DRUG: Sirolimus 1 MG/ML|DRUG: Placebo	Walter K. Kraft		INTERVENTIONAL
NCT04341675	Sirolimus Treatment in Hospitalized Patients With COVID-19 Pneumonia	https://clinicaltrials.gov/study/NCT04341675	COMPLETED	COVID-19	DRUG: Sirolimus|DRUG: Placebo	University of Cincinnati		INTERVENTIONAL
NCT04948203	Assessing the Efficacy of Sirolimus in Patients With COVID-19 Pneumonia for Prevention of Post-COVID Fibrosis	https://clinicaltrials.gov/study/NCT04948203	RECRUITING	Pulmonary Fibrosis|COVID-19 Pneumonia|Long COVID	DRUG: Sirolimus	University of Chicago		INTERVENTIONAL
NCT04374903	Hydroxychloroquine in Combination With Sirolimus and Dexamethasone for Treating COVID-19 Patients	https://clinicaltrials.gov/study/NCT04374903	WITHDRAWN	COVID-19 Patients	DRUG: HCQ & AZ vs HCQ+SIR	King Hussein Cancer Center		INTERVENTIONAL
NCT06257420	Low Dose Rapamycin in ME/CFS, Long-COVID, and Other Infection Associated Chronic Conditions	https://clinicaltrials.gov/study/NCT06257420	ENROLLING_BY_INVITATION	Myalgic Encephalomyelitis|Long-COVID	DRUG: Rapamycin	Simmaron Research Inc.	Center For Complex Diseases-Seattle, WA|Sierra Internal Medicine, Incline Village, NV|Center for Complex Diseases- Palo Alto, CA|Simmaron Research Inc. R&D Lab, University of Wisconsin, Milwaukee (UWM)|Bateman Horne Center, Salt Lake City, UT|Mayo Clinic	OBSERVATIONAL
NCT04482712	Effects of mTOR Inhibition With Sirolimus (RAPA) in Patients With COVID-19 to Moderate the Progression of ARDS	https://clinicaltrials.gov/study/NCT04482712	WITHDRAWN	Acute Lung Injury/Acute Respiratory Distress Syndrome (ARDS)|Respiratory Failure|Sars-CoV2	DRUG: Rapamycin|DRUG: Placebo	The University of Texas Health Science Center at San Antonio	The Claude D. Pepper Older Americans Independence Centers	INTERVENTIONAL
NCT04584710	A Phase 2 Study of RTB101 as COVID-19 Post-Exposure Prophylaxis in Older Adults	https://clinicaltrials.gov/study/NCT04584710	ACTIVE_NOT_RECRUITING	Covid19	DRUG: RTB101|DRUG: Placebo	Restorbio Inc.	National Institute on Aging (NIA)	INTERVENTIONAL
NCT04409327	Phase 2 Study to Determine if RTB101 Reduces the Severity of COVID-19 in Older Adults Residing in Nursing Homes	https://clinicaltrials.gov/study/NCT04409327	TERMINATED	COVID19	DRUG: RTB101|DRUG: Placebo	Restorbio Inc.		INTERVENTIONAL

## Sheet: tianeptine
NCT Number	Study Title	Study URL	Study Status	Conditions	Interventions	Sponsor	Collaborators	Study Type
NCT06012552	Randomized, Double-blind, Placebo-controlled Trial of the Efficacy and Safety of Tianeptine in the Treatment of Covid Fog Symptoms in Patients After COVID-19.	https://clinicaltrials.gov/study/NCT06012552	RECRUITING	Nervous System Diseases	DRUG: Tianeptine|DRUG: Placebo	Military Institute od Medicine National Research Institute	ABM Industries	INTERVENTIONAL

## Sheet: TG-101348
NCT Number	Study Title	Study URL	Study Status	Conditions	Interventions	Sponsor	Collaborators	Study Type
NCT03755518	A Trial of Fedratinib in Subjects With DIPSS, Intermediate or High-Risk Primary Myelofibrosis, Post-Polycythemia Vera Myelofibrosis, or Post-Essential Thrombocythemia Myelofibrosis and Previously Treated With Ruxolitinib	https://clinicaltrials.gov/study/NCT03755518	TERMINATED	Primary Myelofibrosis|Post-Polycythemia Vera Myelofibrosis|Myelofibrosis|Post-essential Thrombocythemia Myelofibrosis	DRUG: FEDRATINIB	Celgene	Impact Biomedicines, Inc., a wholly owned subsidiary of Celgene Corporation	INTERVENTIONAL
